# Supplementary material for: Targeting Aurora-A inhibits tumor progression and sensitizes thyroid carcinoma to Sorafenib by decreasing PFKFB3-mediated glycolysis
Source: PubMed Central journal article supplement (PMC10060208; doi:10.1038/s41419-023-05709-z), 2023-03-29

Fig2

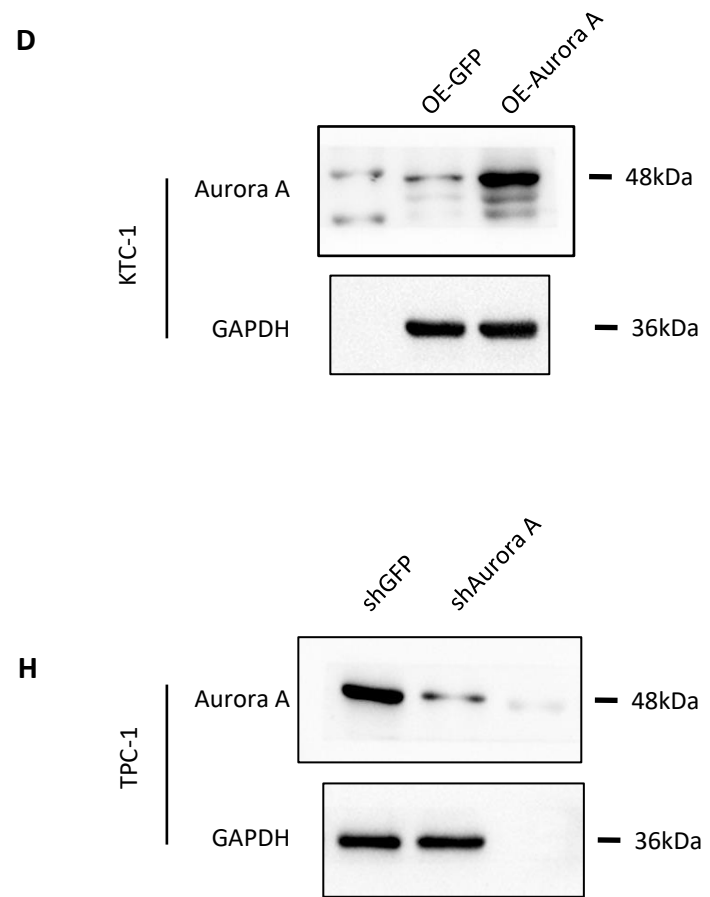

Fig4

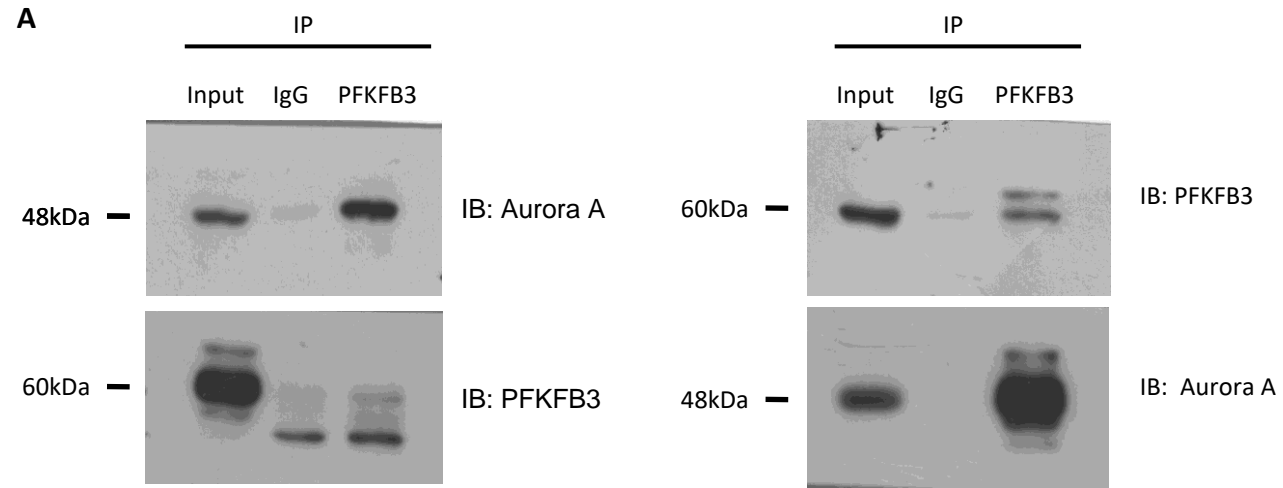

Fig4

B

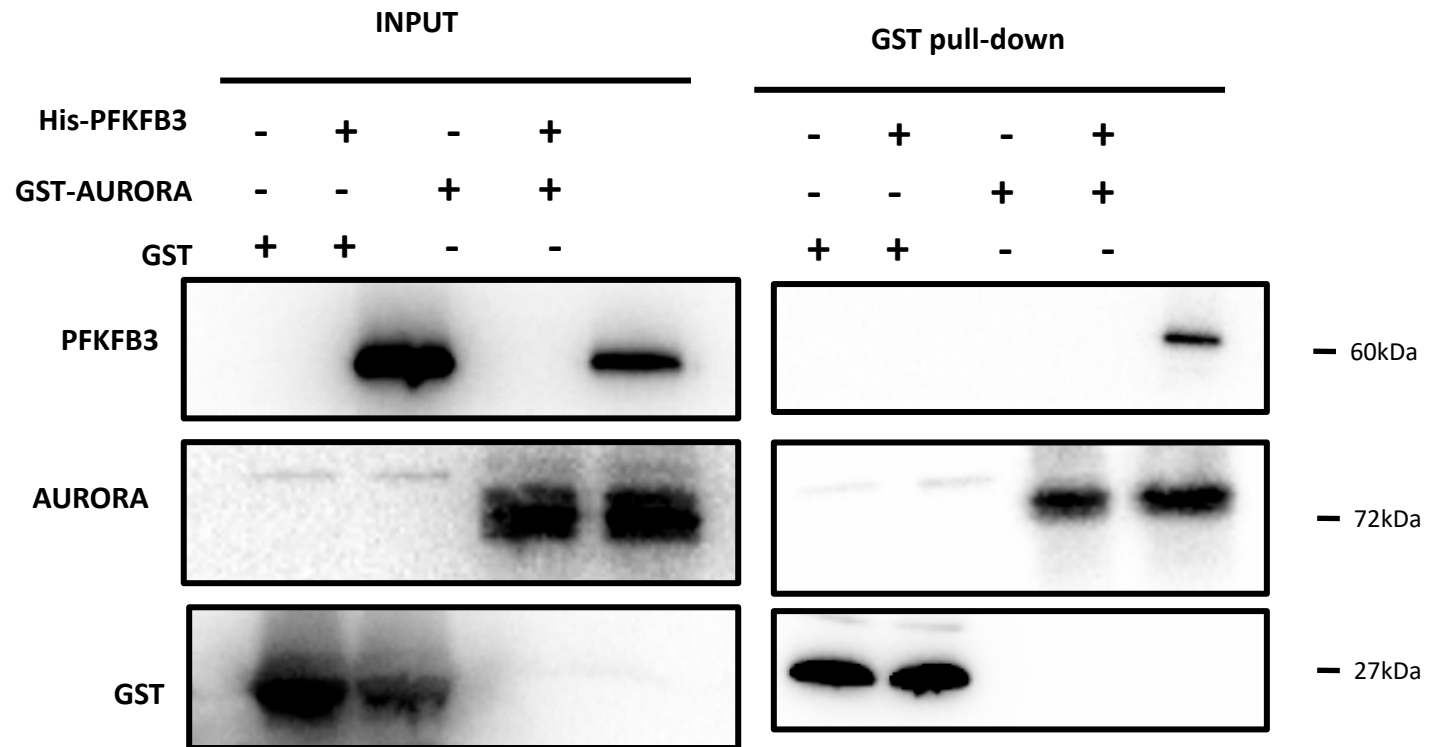

Fig4

c

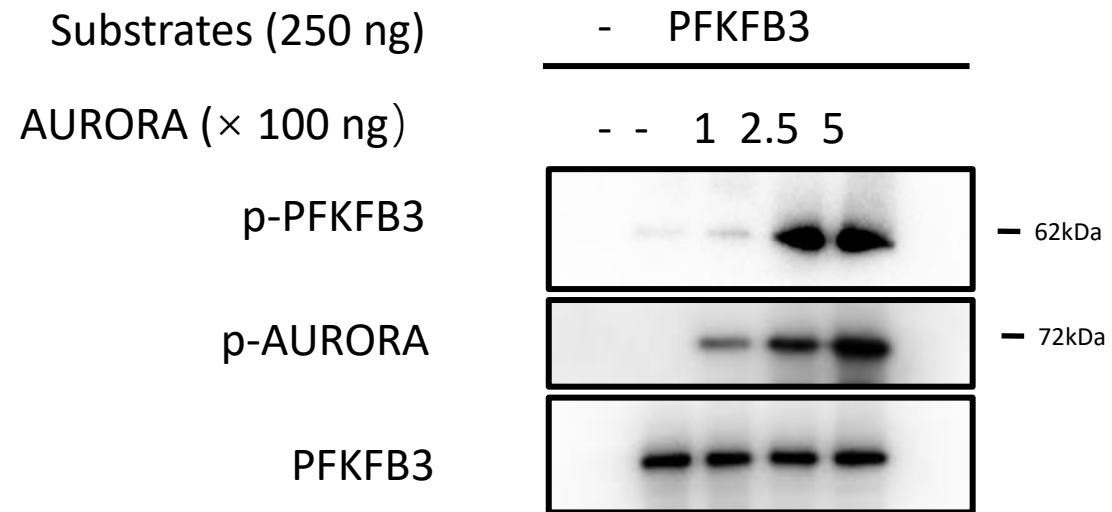



Fig4

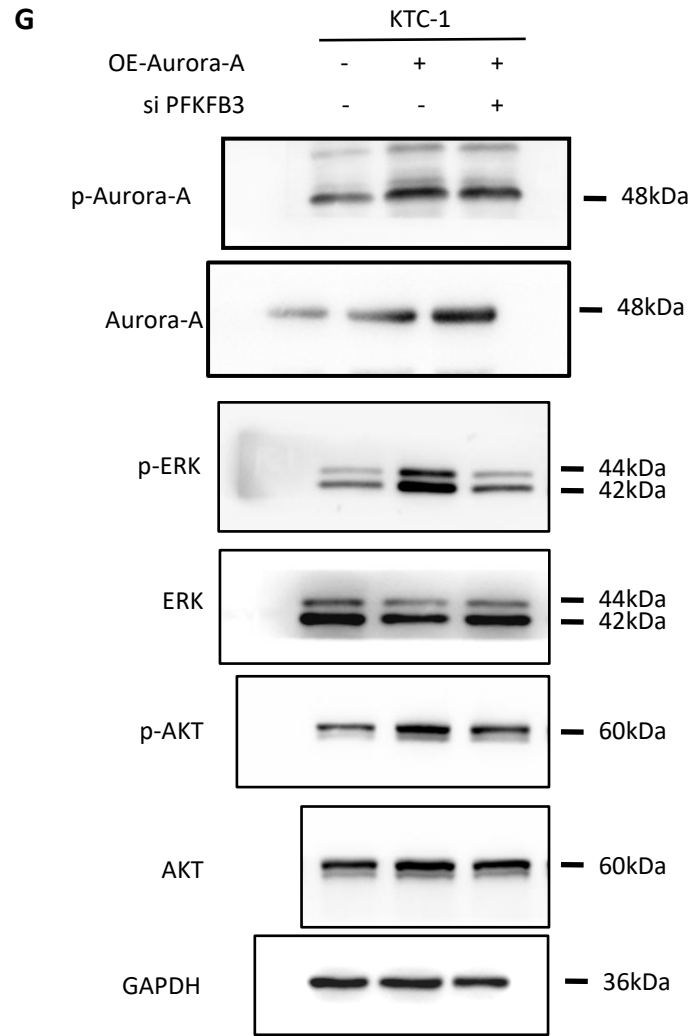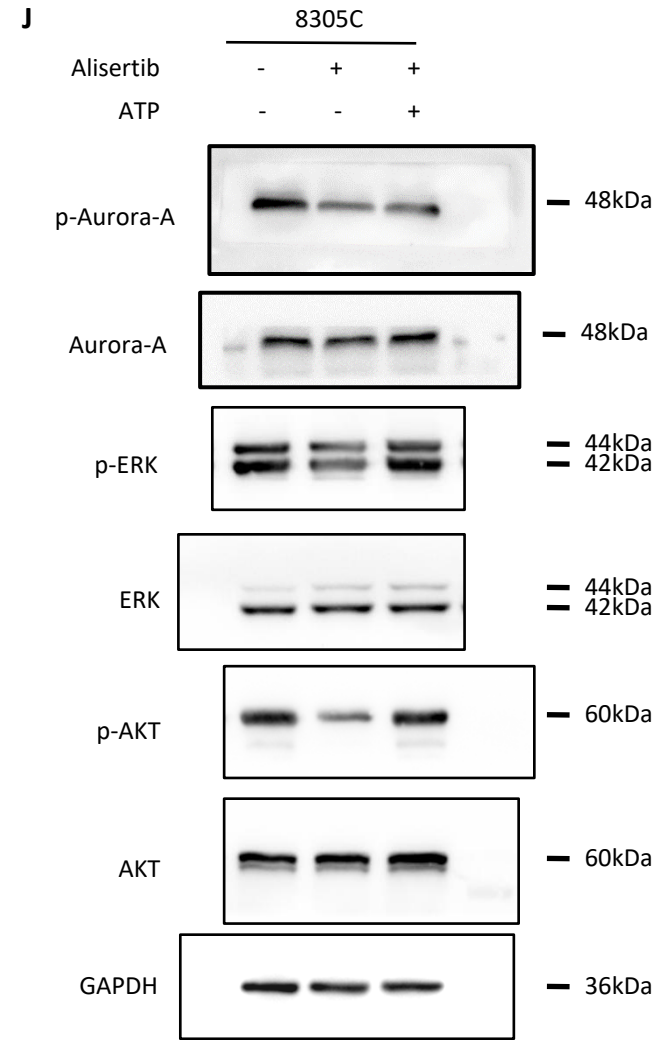

Fig5

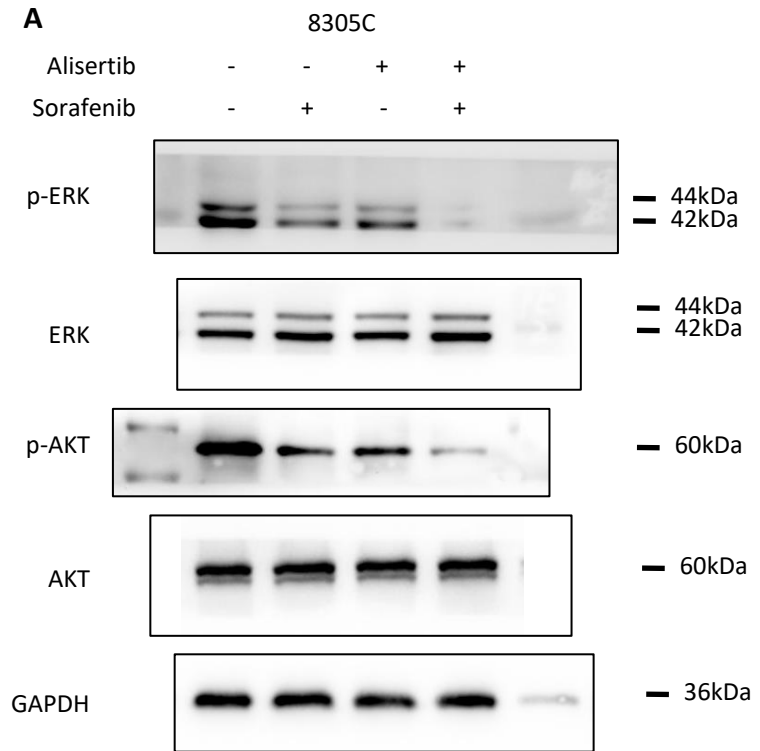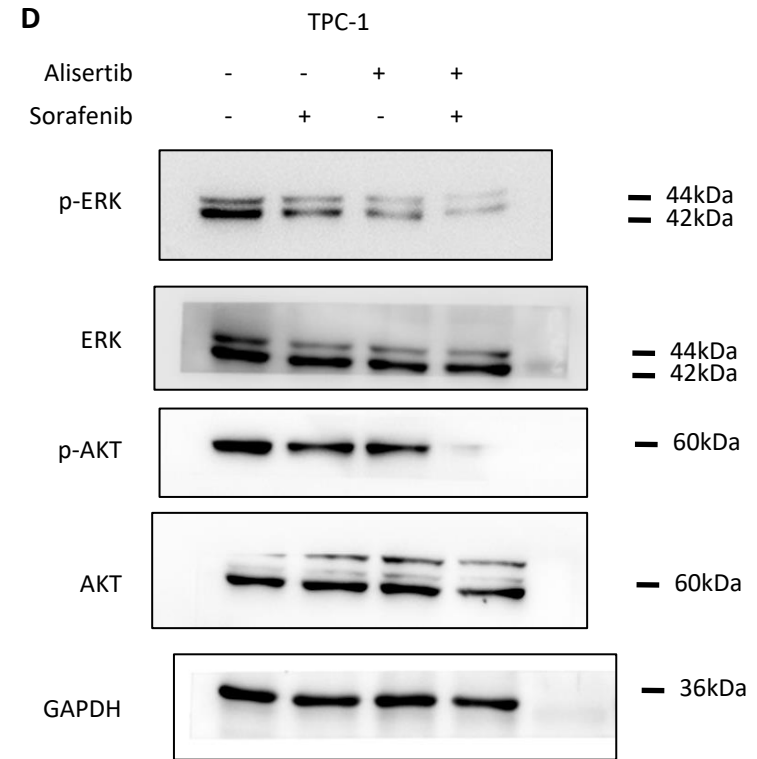

Fig S1

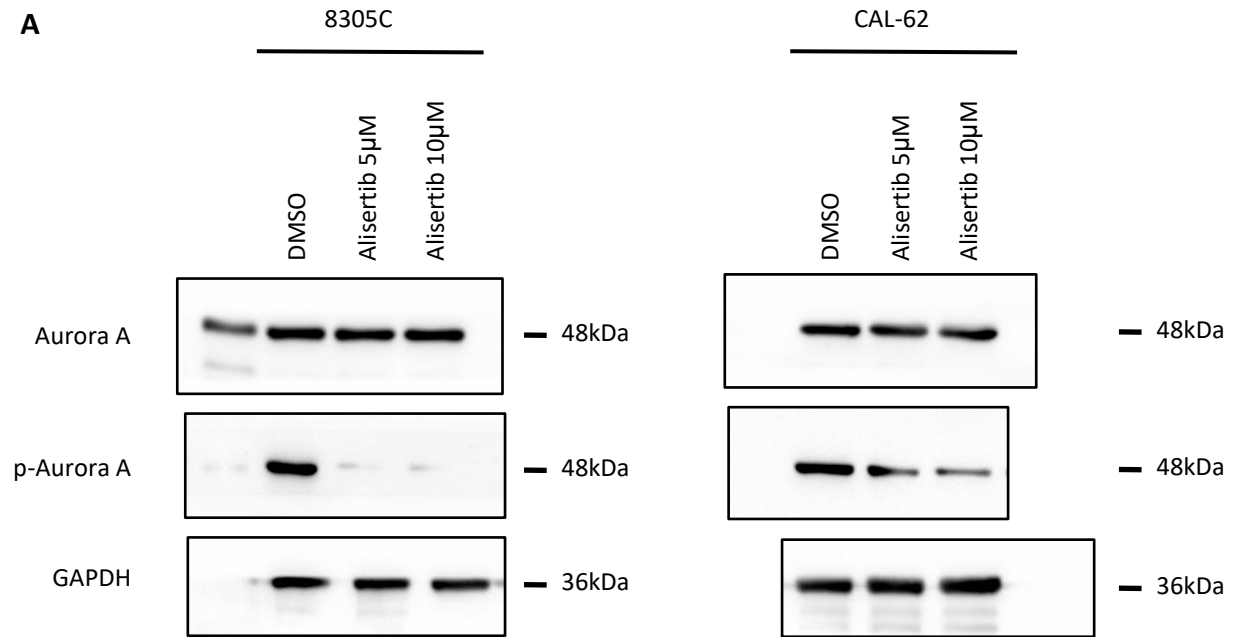



Fig S2

**A**

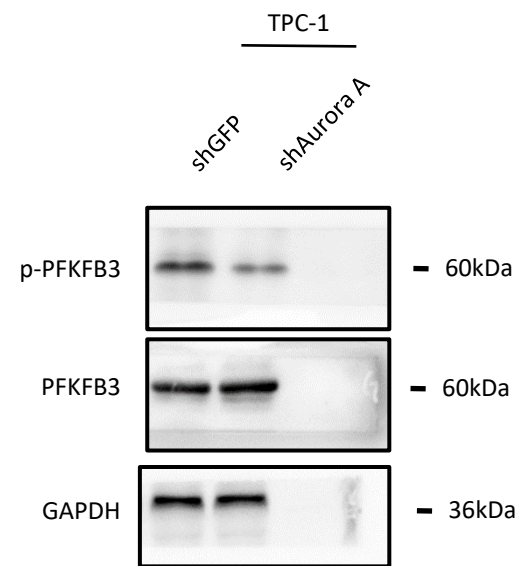

Fig S4

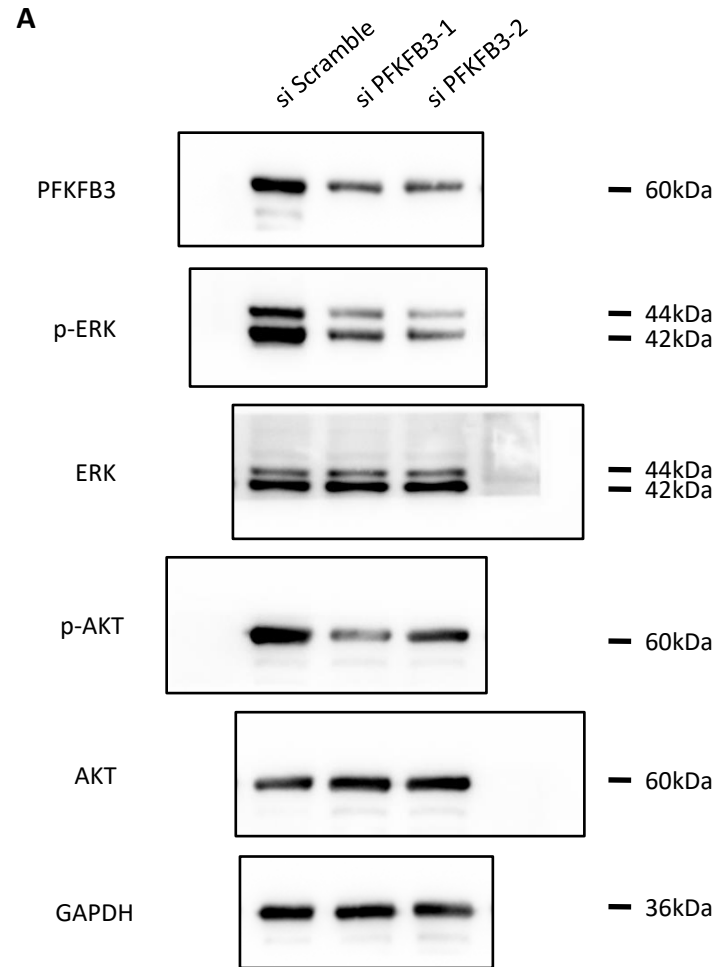

Supplement: 41419_2023_5709_MOESM8_ESM.pdf [file 41419_2023_5709_MOESM8_ESM.pdf]
